# Supplementary material for: Preliminary experience using milnacipran in patients with juvenile fibromyalgia: lessons from a clinical trial program
Source: PubMed Central journal article supplement (PMC4480575; doi:10.1186/s12969-015-0025-9), 2015-06-26
Supplement: 12969_2015_25_MOESM1_ESM.pdf [file 12969_2015_25_MOESM1_ESM.pdf]

# ADDITIONAL FILE 1

**Table S1. Eligibility criteria**

|                           |                                                                                                                                                                                                                                                                                                                                                                                                                                                                                                                                                                                                                                                                                                                                                                                                                                                                                                                                                                                                                                                                                                                                                                                                                                                                                                                                                                                                                                                                                                                                                                                                                                                                                                    |
|---------------------------|----------------------------------------------------------------------------------------------------------------------------------------------------------------------------------------------------------------------------------------------------------------------------------------------------------------------------------------------------------------------------------------------------------------------------------------------------------------------------------------------------------------------------------------------------------------------------------------------------------------------------------------------------------------------------------------------------------------------------------------------------------------------------------------------------------------------------------------------------------------------------------------------------------------------------------------------------------------------------------------------------------------------------------------------------------------------------------------------------------------------------------------------------------------------------------------------------------------------------------------------------------------------------------------------------------------------------------------------------------------------------------------------------------------------------------------------------------------------------------------------------------------------------------------------------------------------------------------------------------------------------------------------------------------------------------------------------|
| <b>Inclusion criteria</b> | <ul style="list-style-type: none"><li>• Male or female outpatients</li><li>• Ages 13 to 17 years, inclusive</li><li>• Primary diagnosis based on Yunus and Masi criteria and/or American College of Rheumatology criteria</li><li>• Average pain score <math>\geq 3</math> and <math>\leq 9</math> at screening (Visit 1)</li><li>• Previous unsatisfactory response to <math>\geq 1</math> nonpharmacologic fibromyalgia treatment</li><li>• Sufficiently stable home life for adequate safety monitoring</li><li>• Normal physical examination, electrocardiogram, and clinical laboratory tests</li><li>• Negative pregnancy test for female participants; adequate contraception for all participants</li><li>• Negative results for urine drug screen</li></ul>                                                                                                                                                                                                                                                                                                                                                                                                                                                                                                                                                                                                                                                                                                                                                                                                                                                                                                                               |
| <b>Exclusion criteria</b> | <ul style="list-style-type: none"><li>• Current severe psychiatric illness, based on Investigator's judgment or patient responses to the Mini International Neuropsychiatric Interview for Children and Adolescents (MINI-KID); applied to patients with current major depressive episode, major depressive disorder, suicidal thoughts or behavior, manic episode, hypomanic episode, bipolar disorder, psychotic disorder, mood disorder with psychotic features, or alcohol/substance abuse</li><li>• Significant risk of suicidality, based on Investigator's judgment or assessments at screening (MINI-KID, Columbia-Suicide Severity Rating Scale)</li><li>• Evidence of active liver disease (ie, aspartate aminotransferase, alanine aminotransferase, and/or alkaline phosphatase <math>&gt; 1.5</math> times the upper limit of normal)</li><li>• Severe renal impairment (ie, creatinine clearance <math>&lt; 30</math> mL/min)</li><li>• Alcohol or substance abuse within the previous year</li><li>• Current systemic infection (eg, human immunodeficiency virus, hepatitis), documented autoimmune disease, or history of seizure disorder other than febrile seizures</li><li>• Any psychiatric or medical condition that could interfere with study conduct, confound the interpretation of study results, or endanger patient wellbeing</li><li>• Any history or behavior that might prohibit compliance for the duration of the study, based on Investigator's judgment</li><li>• Experimental fibromyalgia treatment within 30 days or 5 half-lives (whichever is longer) prior to study entry</li><li>• History of intolerance or hypersensitivity to milnacipran</li></ul> |

**Table S1. Eligibility criteria (continued)**

|                                           |                                                                                                                                                                                                                                                                                                                                                                                                                                                                                                                                                                                                                                                                                                                                                                                                                                                                                                                                                                                                                                                                                                                                                                                                                         |
|-------------------------------------------|-------------------------------------------------------------------------------------------------------------------------------------------------------------------------------------------------------------------------------------------------------------------------------------------------------------------------------------------------------------------------------------------------------------------------------------------------------------------------------------------------------------------------------------------------------------------------------------------------------------------------------------------------------------------------------------------------------------------------------------------------------------------------------------------------------------------------------------------------------------------------------------------------------------------------------------------------------------------------------------------------------------------------------------------------------------------------------------------------------------------------------------------------------------------------------------------------------------------------|
| <b>Prohibited concomitant medications</b> | <ul style="list-style-type: none"><li>• All central nervous system (CNS)-active therapies commonly used to treat fibromyalgia</li><li>• Anorectics (eg, diethylpropion, sibutramine, phentermine, ephedrine, ma huang)</li><li>• Antidepressants (eg, MAO-A or -B inhibitors, tricyclic or tetracyclic antidepressants, SSRIs, SNRIs, NRIs)</li><li>• Antiepileptic agents (eg, phenytoin, topiramate, carbamazepine, levetiracetam, tiagabine, gabapentin, pregabalin)</li><li>• Opiates and related analgesics (eg, oxycodone, codeine, tramadol, narcotic patches)</li><li>• Dopamine agonists (eg, ropinirole, pramipexole)</li><li>• Stimulants (eg, dextroamphetamine mixed salts, methylphenidate, dextroamphetamine, modafinil, ephedrine, ma huang, atomoxetine)</li><li>• Muscle relaxants (eg, tizanidine, metaxalone, methocarbamol, carisoprodol)</li><li>• Miscellaneous excluded medications (eg, buspirone, sodium oxybate)</li></ul>                                                                                                                                                                                                                                                                   |
| <b>Allowed concomitant medications</b>    | <ul style="list-style-type: none"><li>• 5-hydroxytryptamine agonists (triptans) for migraines, with caution; Investigators were informed about serotonin syndrome or neuroleptic malignant syndrome-like reactions</li><li>• Combination agents consisting of butalbital, aspirin/acetaminophen, and caffeine for headaches; required discontinuation of these medications for at least 1 week prior to study visits</li><li>• Acetaminophen, aspirin, and other nonsteroidal anti-inflammatory drugs</li><li>• Sleep medications (eg, nonbenzodiazepine hypnotics per Investigator's judgment, antihistamines, chloral hydrate)</li><li>• Epinephrine for severe allergic reaction; cautioned use of local anesthetics that contain epinephrine</li><li>• Nasal decongestants containing pseudoephedrine or herbal supplements containing stimulants, with cautioned use after consultation with Investigator</li><li>• Nonpharmacologic treatments (eg, physical therapy, acupuncture, chiropractic manipulation, massage therapy, cognitive behavioral therapy, psychological therapy, biofeedback) that were initiated &gt;30 days prior to screening and continued without major change during the study</li></ul> |

**Table S2. Schedule of assessments**

|                                                                               | Randomized Withdrawal Study          |                                |                   |      |                   |      |                                  |       |       |               |                                            | Extension Study                 |                                  |       |       |       |       |       |                               |       |   |
|-------------------------------------------------------------------------------|--------------------------------------|--------------------------------|-------------------|------|-------------------|------|----------------------------------|-------|-------|---------------|--------------------------------------------|---------------------------------|----------------------------------|-------|-------|-------|-------|-------|-------------------------------|-------|---|
|                                                                               | Screening/<br>Washout<br>(1-4 Weeks) | Open-Label Period<br>(8 Weeks) |                   |      |                   |      | Double-Blind Period<br>(8 Weeks) |       |       |               | Down<br>Titration <sup>a</sup><br>(1 Week) | Dose<br>Escalation<br>(4 Weeks) | Stable-Dose Period<br>(48 Weeks) |       |       |       |       |       | Down<br>Titration<br>(1 Week) |       |   |
| Study visit                                                                   | SCR<br>Wk -1 to -4                   | BL<br>Wk 0                     | Wk 1 <sup>b</sup> | Wk 2 | Wk 3 <sup>b</sup> | Wk 4 | RA<br>Wk 8                       | Wk 10 | Wk 14 | EOT/<br>Wk 16 | Wk 17                                      | BL<br>Wk 0                      | Wk 4                             | Wk 12 | Wk 20 | Wk 28 | Wk 36 | Wk 44 | EOT/<br>Wk 52                 | Wk 53 |   |
| Physical examination                                                          | X                                    |                                |                   |      |                   |      |                                  |       |       | X             |                                            | X                               |                                  |       |       |       |       |       | X                             |       |   |
| Vital signs                                                                   | X                                    | X                              |                   | X    |                   | X    | X                                | X     | X     | X             | X                                          | X                               | X                                | X     | X     | X     | X     | X     | X                             | X     | X |
| Clinical laboratory tests                                                     | X                                    | X                              |                   | X    |                   | X    | X                                |       | X     | X             |                                            | X                               | X                                | X     |       | X     |       |       | X                             |       |   |
| Electrocardiogram                                                             |                                      | X                              |                   |      |                   | X    | X                                | X     |       | X             |                                            | X                               |                                  | X     |       | X     |       |       | X                             |       |   |
| Adverse events                                                                | X                                    | X                              | X                 | X    | X                 | X    | X                                | X     | X     | X             | X                                          | X                               | X                                | X     | X     | X     | X     | X     | X                             | X     | X |
| Pain rating scale                                                             | X                                    | X                              | X                 | X    | X                 | X    | X                                | X     | X     | X             |                                            | X                               | X                                | X     | X     | X     | X     | X     | X                             | X     |   |
| Pain rating scale (daily compliance) <sup>c</sup>                             |                                      | X                              |                   | X    |                   | X    | X                                | X     | X     |               |                                            |                                 |                                  |       |       |       |       |       |                               |       |   |
| Alternative FM treatment assessment <sup>d</sup>                              |                                      |                                |                   |      |                   |      |                                  | X     | X     | X             |                                            |                                 |                                  |       |       |       |       |       |                               |       |   |
| Patient Global Impression of Severity                                         | X                                    | X                              |                   | X    |                   | X    | X                                | X     | X     | X             |                                            | X                               | X                                | X     | X     | X     | X     | X     | X                             | X     |   |
| Pediatric Quality of Life Inventory –<br>Teen Report                          |                                      | X                              |                   |      |                   |      | X                                |       |       | X             |                                            | X                               | X                                | X     | X     | X     | X     | X     | X                             |       |   |
| Multidimensional Anxiety Scale for<br>Children                                |                                      | X                              |                   |      |                   |      | X                                |       |       | X             |                                            | X                               | X                                | X     | X     | X     | X     | X     | X                             |       |   |
| Children's Depression Inventory                                               |                                      | X                              |                   |      |                   |      | X                                |       |       | X             |                                            | X                               | X                                | X     | X     | X     | X     | X     | X                             |       |   |
| Columbia-Suicide Severity Rating Scale<br>(electronic version)                | X                                    | X                              |                   | X    |                   | X    | X                                | X     | X     | X             | X                                          | X                               | X                                | X     | X     | X     | X     | X     | X                             | X     | X |
| Mini International Neuropsychiatric<br>Interview for Children and Adolescents | X                                    |                                |                   |      |                   |      |                                  |       |       |               |                                            |                                 |                                  |       |       |       |       |       |                               |       |   |

<sup>a</sup> In patients who received milnacipran  $\geq 50$  mg/day and did not continue into the extension study; <sup>b</sup> telephone visit; <sup>c</sup> study center personnel monitored patient compliance with entry of daily pain ratings via an interactive web or voice response system during the randomized withdrawal study; <sup>d</sup> patients were also allowed to contact study center personnel if an alternative treatment was required, with a study visit scheduled as needed.

BL=baseline; EOT=end of treatment (last study visit in patients who discontinued for any reason); FM=fibromyalgia; RA=randomization visit; SCR=screening visit.

**Table S3. Potentially clinically significant vital signs and electrocardiograms**

| PCS criteria, n/N (%) <sup>a</sup> | Randomized Withdrawal Study |                     |             | Extension Study |
|------------------------------------|-----------------------------|---------------------|-------------|-----------------|
|                                    | Open-Label Period           | Double-Blind Period |             |                 |
|                                    | Milnacipran                 | Placebo             | Milnacipran |                 |
| <b>Vital signs</b>                 |                             |                     |             |                 |
| SBP, mm Hg                         |                             |                     |             |                 |
| ≥130 + ≥20 increase                | 8/116 (6.9)                 | 0                   | 1/14 (7.1)  | 6/55 (10.9)     |
| ≤90 + ≥20 decrease                 | 0                           | 0                   | 0           | 0               |
| ≥140                               | 5/116 (4.3)                 | 0                   | 0           | 3/55 (5.5)      |
| DBP, mm Hg                         |                             |                     |             |                 |
| ≥80 + ≥20 increase                 | 11/116 (9.5)                | 1/6 (16.7)          | 1/14 (7.1)  | 7/55 (12.7)     |
| ≤20 + ≥20 decrease                 | 0                           | 0                   | 0           | 0               |
| ≥90                                | 10/116 (8.6)                | 0                   | 1/14 (7.1)  | 7/55 (12.7)     |
| SBP and DBP, mm Hg                 |                             |                     |             |                 |
| ≥140 and ≥90                       | 4/116 (3.4)                 | 0                   | 0           | 2/55 (3.6)      |
| Heart rate, bpm                    |                             |                     |             |                 |
| ≥110 + ≥30 increase                | 11/116 (9.5)                | 0                   | 0           | 7/55 (12.7)     |
| ≤55 + ≥30 decrease                 | 0                           | 0                   | 0           | 0               |
| Weight, kg                         |                             |                     |             |                 |
| ≥7% increase                       | 1/116 (0.9)                 | 0                   | 1/14 (7.1)  | 7/55 (12.7)     |
| ≥7% decrease                       | 3/116 (2.6)                 | 0                   | 0           | 13/55 (23.6)    |
| <b>Electrocardiograms</b>          |                             |                     |             |                 |
| Heart rate ≥120 bpm                | 0                           | 0                   | 0           | 0               |
| Heart rate ≤50 bpm                 | 1/112 (0.9)                 | 0                   | 0           | 1/51 (2.0)      |
| Heart rate increase ≥20 bpm        | 42/112 (37.5)               | 0                   | 1/14 (7.1)  | 17/51 (33.3)    |
| QRS ≥100 msec                      | 7/103 (6.8)                 | 2/6 (33.3)          | 0           | 8/49 (16.3)     |
| PR >200 msec                       | 0                           | 0                   | 0           | 0               |
| QTcB >450 msec                     | 10/110 (9.1)                | 1/6 (16.7)          | 1/14 (7.1)  | 6/49 (12.2)     |
| QTcF >450 msec                     | 0                           | 0                   | 0           | 0               |

<sup>a</sup> For increases and decreases, baseline was defined as follows: for the open-label period and extension study, last available assessment before the first dose of open-label treatment in the randomized withdrawal study; for the double-blind period, last available assessment before the first dose of double-blind treatment in the randomized withdrawal study.

DBP=diastolic blood pressure, n=number of patients meeting PCS criteria, N=number of patients with ≥1 post-baseline assessment, PCS=potentially clinically significant, SBP=systolic blood pressure.

**Table S4. Potentially clinically significant laboratory values**

| PCS criteria, n/N (%) <sup>a</sup>                  | Randomized Withdrawal Study |                     |             | Extension Study |
|-----------------------------------------------------|-----------------------------|---------------------|-------------|-----------------|
|                                                     | Open-Label Period           | Double-Blind Period |             |                 |
|                                                     | Milnacipran                 | Placebo             | Milnacipran |                 |
| Eosinophils, percent<br>>2 * ULN                    | 2/91 (2.2)                  | 0                   | 0           | 0               |
| Lymphocytes, percent<br><0.6 * LLN                  | 2/92 (2.2)                  | 0                   | 0           | 2/52 (3.8)      |
| White blood cells, 10 <sup>9</sup> /L<br><0.7 * LLN | 2/115 (1.7)                 | 0                   | 0           | 2/55 (3.6)      |
| ALT (SGPT), U/L<br>>3 * ULN                         | 0                           | 0                   | 0           | 2/55 (3.6)      |
| AST (SGOT), U/L<br>>3 * ULN                         | 0                           | 0                   | 0           | 2/55 (3.6)      |

<sup>a</sup> Table includes laboratory values that were met by  $\geq 2\%$  of patients during the open-label period of the randomized withdrawal study or by  $\geq 2\%$  of patients during the extension study. Baseline was defined as the last available assessment before first dose open-label treatment in the randomized withdrawal study.

ALT (SGPT)=alanine aminotransferase (serum glutamic-pyruvic transaminase), AST (SGOT)=aspartate aminotransferase (serum glutamic oxaloacetic transaminase); LLN=lower limit of normal range; n=number of patients meeting PCS criteria, N=number of patients with a non-PCS baseline and  $\geq 1$  post-baseline assessment, PCS=potentially clinically significant, ULN=upper limit of normal range.

**Figure S1. Pain responders in the open-label extension study**

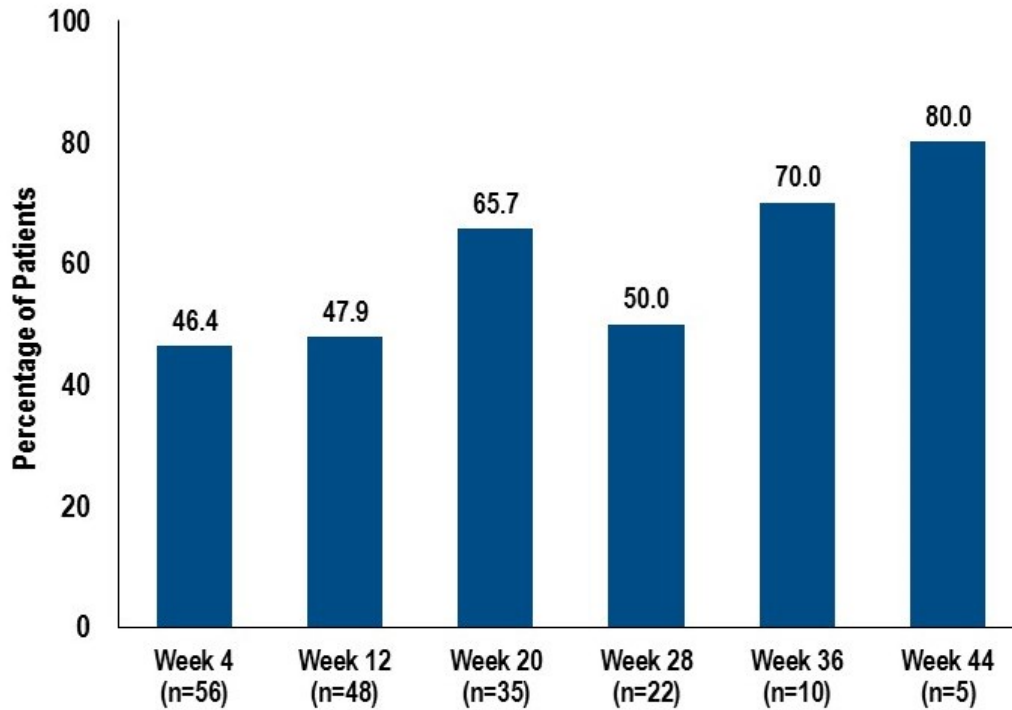

Figure shows the percentage of patients at each study visit who had  $\geq 30\%$  pain improvement from baseline, defined as the weekly average of daily pain ratings that were taken before start of open-label treatment in the prior randomized withdrawal study. The n-values represent numbers of patients at each extension study visit with available pain assessments; graph only includes study visits that had  $> 1$  patient.

**Figure S2. Treatment-emergent adverse events (TEAEs) and newly emergent adverse events (NEAEs) in the open-label extension study**

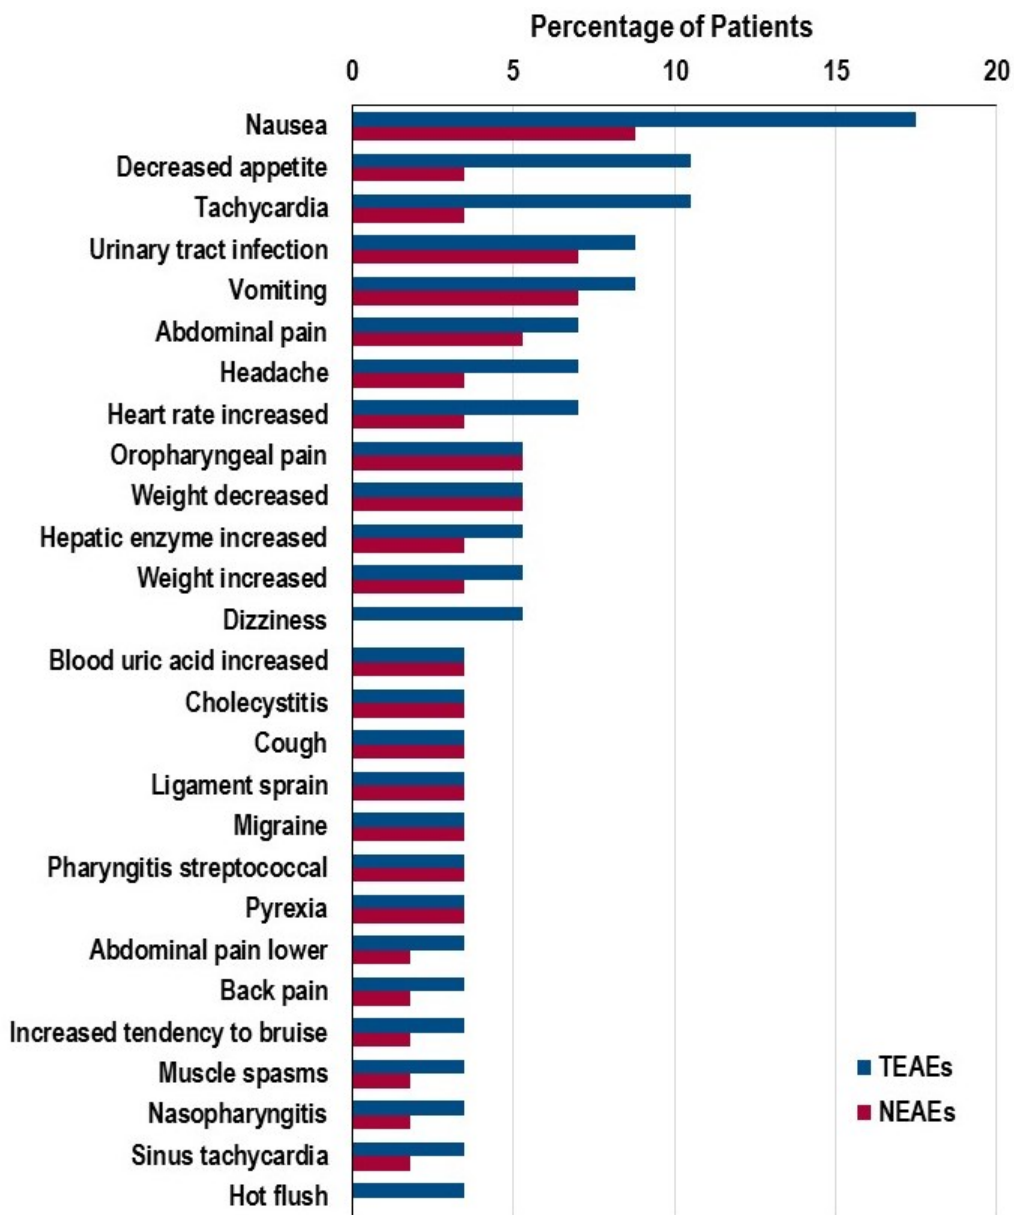

Figure shows all TEAEs that were reported in  $\geq 2\%$  of patients in the safety population.
